# Supplementary material for: Prognostic factors of Erdheim–Chester disease: a nationwide survey in Japan
Source: PubMed Central journal article supplement — Haematologica. 2018 Jul 5;103(11):1815–24. doi: 10.3324/haematol.2018.190728 (PMC6278973; doi:10.3324/haematol.2018.190728), 2018-11
Supplement: 2018.190728.TOYA_SUPPL.pdf [file 2018.190728.TOYA_SUPPL.pdf]

## Prognostic factors of Erdheim–Chester disease: a nationwide survey in Japan

Takashi Toya,<sup>1\*</sup> Mizuki Ogura,<sup>1\*</sup> Kazuhiro Toyama,<sup>2</sup> Akihide Yoshimi,<sup>1</sup> Aya Shinozaki-Ushiku,<sup>3</sup> Akira Honda,<sup>1</sup> Kenjiro Honda,<sup>4</sup> Noriko Hosoya,<sup>5</sup> Yukako Murakami,<sup>6</sup> Hiroyuki Kawashima,<sup>7</sup> Yasuhito Nannya,<sup>1</sup> Shunya Arai,<sup>1</sup> Fumihiko Nakamura,<sup>1</sup> Yusuke Shinoda,<sup>8</sup> Masaomi Nangaku,<sup>4</sup> Kiyoshi Miyagawa,<sup>5</sup> Masashi Fukayama,<sup>3</sup> Akiko Moriya-Saito,<sup>9</sup> Ichiro Katayama,<sup>6</sup> Takashi Ogura<sup>10</sup> and Mineo Kurokawa<sup>1,2</sup>

<sup>1</sup>Department of Hematology & Oncology, Graduate School of Medicine, The University of Tokyo; <sup>2</sup>Department of Cell Therapy and Transplantation Medicine, The University of Tokyo Hospital; <sup>3</sup>Department of Pathology, Graduate School of Medicine, The University of Tokyo; <sup>4</sup>Division of Nephrology and Endocrinology, The University of Tokyo Graduate School of Medicine; <sup>5</sup>Laboratory of Molecular Radiology, Center for Disease Biology and Integrative Medicine, Graduate School of Medicine, The University of Tokyo; <sup>6</sup>Department of Dermatology, Osaka University Graduate School of Medicine; <sup>7</sup>Division of Orthopedic Surgery, Niigata University Graduate School of Medical and Dental Sciences; <sup>8</sup>Department of Rehabilitation Medicine Graduate School of Medicine, The University of Tokyo; <sup>9</sup>Clinical Research Center, National Hospital Organization Nagoya Medical Center, Aichi and <sup>10</sup>Department of Respiratory Medicine, Kanagawa Cardiovascular and Respiratory Center, Yokohama, Japan

*\*TT and MO contributed equally to this work*

©2018 Ferrata Storti Foundation. This is an open-access paper. doi:10.3324/haematol.2018.190728

Received: February 8, 2018.

Accepted: July 4, 2018.

Pre-published: July 5, 2018.

Correspondence: kurokawa-ty@umin.ac.jp

---

## Supplementary Data

**Supplementary Table S1. First signs and involved organs in the clinical course**

| UP N | Age at onset | First signs          | Involved organs                                                                                                                                                                                                                                                       | Outcome (survival year from onest) | REF |
|------|--------------|----------------------|-----------------------------------------------------------------------------------------------------------------------------------------------------------------------------------------------------------------------------------------------------------------------|------------------------------------|-----|
| 1    | 49           | Bone pain            | Bone, digestive organ (liver), kidney and retroperitoneal organ (renal infiltration), skin (erythema), breast, gingiva, lymph node                                                                                                                                    | Alive (2.83+)                      | 1   |
| 2    | 44           | Xanthelasma          | Bone, cardiovascular system (LVH, PE, coated aorta), endocrine organ (hypopituitarism), kidney and retroperitoneal organ (hydronephrosis), skin (xanthelasma)                                                                                                         | Dead (10.92)                       | 2,3 |
| 3    | 30           | Bone pain, DI, fever | Bone, cardiovascular system (palpitation), endocrine organ (DI)                                                                                                                                                                                                       | Alive (6.92+)                      | 4,5 |
| 4    | 44           | Fever, malaise       | Bone, lung (interlobular septal thickening, cyst)                                                                                                                                                                                                                     | Dead (5.75)                        | N/A |
| 5    | 40           | DI                   | CNS (exophthalmos), endocrine organ (DI)                                                                                                                                                                                                                              | Dead (7.83)                        | N/A |
| 6    | 41           | Bone pain, fever     | Bone                                                                                                                                                                                                                                                                  | Alive (13.25)                      | 6   |
| 7    | 67           | Dyspnea              | Bone, cardiovascular system (cardiac tamponade, coated aorta), CNS (exophthalmos, spinal tumor), digestive organ (liver, pancreas), kidney and retroperitoneal organ (hydronephrosis), lung (pleural thickening and fibrosis), adrenal gland, bladder, spleen, testis | Dead (0.58)                        | N/A |
| 8    | 40           | Bone pain            | Bone, skin (papule)                                                                                                                                                                                                                                                   | Alive (10.08+)                     | N/A |
| 9    | 68           | Fever, malaise       | Bone, CNS (meningeal tumor), glottis                                                                                                                                                                                                                                  | Alive (1.08+)                      | N/A |
| 10   | 33           | Bone pain, fever     | Bone                                                                                                                                                                                                                                                                  | Alive (3.92+)                      | N/A |
| 11   | 68           | Bone pain, malaise   | Bone                                                                                                                                                                                                                                                                  | Alive (3.75+)                      | N/A |
| 12   | 41           | Bone pain, vertigo   | Bone, CNS (parenchymal mass)                                                                                                                                                                                                                                          | Alive (6.50+)                      | N/A |
| 13   | 28           | DI, xanthelasma      | Bone, endocrine organ (DI), skin (xanthelasma)                                                                                                                                                                                                                        | Alive (5.25+)                      | N/A |
| 14   | 56           | Low vision           | Cardiovascular system (coated aorta), CNS (exophthalmos), endocrine organ (hypothyroidism), kidney and retroperitoneal organ (hydronephrosis), skin (xanthelasma)                                                                                                     | Dead (4.58)                        | 7   |
| 15   | 44           | Femoral tumor        | Skin (subcutaneous tumor)                                                                                                                                                                                                                                             | Alive (1.00+)                      | N/A |
| 16   | 59           | Body weight loss     | Bone, cardiovascular system (coated aorta), endocrine organ (hypopituitarism), kidney and retroperitoneal organ (hydronephrosis), skin (xanthelasma)                                                                                                                  | Alive (3.58+)                      | N/A |
| 17   | 53           | Xanthelasma          | Bone, endocrine organ (DI), kidney and retroperitoneal organ, skin (xanthelasma)                                                                                                                                                                                      | Alive (5.33+)                      | N/A |
| 18   | 65           | DI                   | Bone, cardiovascular system (heart failure, LVH, coated aorta), CNS (impaired consciousness), digestive organ (pancreatomegaly), endocrine organ (DI), kidney and retroperitoneal organ (hairy kidney), lung (details unknown)                                        | Alive (2.75+)                      | N/A |

|    |    |                                              |                                                                                                                                                                                                                                                       |                |        |
|----|----|----------------------------------------------|-------------------------------------------------------------------------------------------------------------------------------------------------------------------------------------------------------------------------------------------------------|----------------|--------|
| 19 | 40 | Bone pain                                    | Bone                                                                                                                                                                                                                                                  | Alive (10.08+) | N/A    |
| 20 | 68 | Incidentally detected pulmonary infiltration | Bone, CNS (meningeal tumor), endocrine organ (pituitary tumor), cardiovascular system (heart failure), lung (centrilobular shadow, pleural thickening, fibrosis and pneumosclerosis)                                                                  | Dead (4.50)    | N/A    |
| 21 | 45 | DI                                           | Bone, CNS (cerebellar ataxia, exophthalmos), endocrine organ (DI), cardiovascular system (cardiac tamponade, mitral regurgitation, carotid stenosis), lung (cyst), kidney and retroperitoneal organ (retroperitoneal fibrosis, renal artery stenosis) | Alive (6.42+)  | N/A    |
| 22 | 67 | Dysarthria, vertigo, vomiting                | CNS (cerebellar ataxia, meningeal tumor), kidney and retroperitoneal organ (hairy kidney)                                                                                                                                                             | Dead (0.25)    | N/A    |
| 23 | 46 | Dyspnea                                      | Bone, cardiovascular system (heart failure, pulmonary hypertension), lung (interlobular septal thickening)                                                                                                                                            | Dead (11.33)   | N/A    |
| 24 | 27 | Malaise                                      | Bone, cardiovascular system (right atrial tumor), lung (cyst, obstructive disorder), kidney and retroperitoneal organ, skin (xanthelasma), gingiva, sinus                                                                                             | Alive (13.25+) | N/A    |
| 25 | 46 | Bone pain                                    | Bone, cardiovascular system (PE, coated aorta), CNS (parenchymal mass), digestive organ, endocrine organ (DI), kidney and retroperitoneal organ (hairy kidney, hydronephrosis)                                                                        | Dead (3.58)    | 8,9    |
| 26 | 49 | Dyspnea                                      | Bone, lung (cyst, pleural thickening)                                                                                                                                                                                                                 | Alive (7.08+)  | 10     |
| 27 | 25 | DI                                           | Bone, endocrine organ (DI), kidney and retroperitoneal organ (hydronephrosis), skin (xanthelasma)                                                                                                                                                     | Dead (14.58)   | 11, 12 |
| 28 | 76 | edema                                        | Bone, CNS (papilledema), cardiovascular system (PE), kidney and retroperitoneal organ (hairy kidney), breast                                                                                                                                          | Dead (2.25)    | 13     |
| 29 | 40 | Amenorrhea, DI, malaise                      | Bone, CNS (parenchymal mass), endocrine organ (hypopituitarism), lung (detail unknown)                                                                                                                                                                | alive (4.00+)  | N/A    |
| 30 | 62 | Fever, malaise                               | Bone, CNS (parenchymal mass), skin (tumor), oral mucosa                                                                                                                                                                                               | Dead (0.75)    | N/A    |
| 31 | 57 | Dyspnea, fever, general malaise              | Bone, cardiovascular system (cardiac tamponade), kidney and retroperitoneal organ (hydronephrosis, peritoneal fibrosis)                                                                                                                               | Alive (6.67+)  | N/A    |
| 32 | 62 | Pericardial effusion                         | cardiovascular system (cardiac tamponade, right atrium tumor), CNS (subdural tumor), skin (xanthelasma)                                                                                                                                               | Dead (4.33)    | 14     |
| 33 | 48 | Bone pain                                    | Bone, skin (xanthelasma)                                                                                                                                                                                                                              | Alive (21.08+) | N/A    |
| 35 | 58 | Neck pain, numbness                          | Bone, CNS (parenchymal mass), kidney and retroperitoneal organ (hairy kidney, renal hypertension)                                                                                                                                                     | Alive (5.08+)  | N/A    |
| 36 | 72 | Bone pain, fever                             | Bone, cardiovascular system (PE, atrioventricular block), CNS (cerebellar ataxia), endocrine organ (hypopituitarism), kidney and retroperitoneal organ (hydronephrosis), skin (erythema)                                                              | Alive (1.67+)  | N/A    |
| 37 | 66 | Numbness                                     | Bone, cardiovascular system (coronary artery disease, coated aorta), CNS (parenchymal mass), skin (xanthelasma), lymph node                                                                                                                           | Dead (1.83)    | N/A    |
| 38 | 67 | Dry cough, fever                             | Cardiovascular system (mitral regurgitation, right bundle branch block), CNS (pia mater involvement), digestive organ (liver, pancreas, esophagus, stomach, intestine, colon) , endocrine organ (pituitary tumor),                                    | Dead (0.83)    | N/A    |

|    |    |                      |                                                                                                                                                                                                                                             |                |     |
|----|----|----------------------|---------------------------------------------------------------------------------------------------------------------------------------------------------------------------------------------------------------------------------------------|----------------|-----|
|    |    |                      | lung (fibrosis, interlobular septal and pleural thickening), kidney and retroperitoneal organ (hairy kidney), skin (erosion), bone marrow, lymph node, spleen                                                                               |                |     |
| 39 | 54 | Bone pain            | Bone                                                                                                                                                                                                                                        | Alive (1.83+)  | N/A |
| 40 | 56 | Bone pain, fever     | Bone, cardiovascular system (coronary artery disease, mitral regurgitation, coated aorta), CNS (parenchymal mass), endocrine organ (DI), kidney and retroperitoneal organ (hairy kidney), lung (interlobular septal and pleural thickening) | Dead (7.42)    | N/A |
| 41 | 47 | Bone pain, fever     | Bone, cardiovascular system (pericarditis, coated aorta), CNS (exophthalmos), kidney and retroperitoneal organ (hydronephrosis), skin (phlebitis-like rash)                                                                                 | Dead (10.42)   | N/A |
| 42 | 66 | Bone pain, headache  | Bone, cardiovascular system (coated aorta), CNS (meningeal and parenchymal tumor), endocrine organ (DI), kidney and retroperitoneal organ (hilar tumor), lung (interlobular thickening)                                                     | Alive (3.17+)  | N/A |
| 43 | 70 | Dyspnea              | Bone, cardiovascular system (PE), kidney and retroperitoneal organ (hairy kidney), skin (xanthelasma)                                                                                                                                       | Alive (1.17+)  | N/A |
| 44 | 23 | Bone pain            | Bone, cardiovascular system (right coronary invasion), CNS (parenchymal mass), endocrine organ (DI), kidney and retroperitoneal organ (hydronephrosis), lung (interlobular thickening)                                                      | Alive (11.08+) | N/A |
| 45 | 68 | Bone pain, dyschezia | Bone, digestive organ (rectal tumor), prostate                                                                                                                                                                                              | Dead (0.83)    | N/A |

UPN indicates unique patient number; REF indicates Supplemental references listed below and N/A indicates that no article about the patient has been reported; CNS indicates central nervous system; DI indicates diabetes insipidus; PE indicates pericardial effusion; LVH indicates left ventricular hypertrophy

**Supplementary Table S2. Cause of death**

| UPN | Cause of death                   |
|-----|----------------------------------|
| 2   | Unknown                          |
| 4   | ECD                              |
| 5   | Unknown                          |
| 7   | Arrhythmia                       |
| 14  | Renal failure                    |
| 20  | Pneumonia                        |
| 22  | Brain hypertension               |
| 23  | Respiratory failure              |
| 25  | Heart and renal failure          |
| 27  | Unknown                          |
| 28  | ECD                              |
| 30  | Infection                        |
| 32  | Heart failure                    |
| 37  | Invasive pulmonary aspergillosis |
| 38  | Sepsis due to rectal perforation |
| 40  | Heart failure                    |
| 41  | Heart failure                    |
| 45  | ECD                              |

ECD indicates Erdheim–Chester disease;

**Supplementary Table S3. *BRAF* mutation status of clinical samples**

| UPN | Type of sample        | Sanger sequencing | <i>BRAF</i> mutation status of each patient |
|-----|-----------------------|-------------------|---------------------------------------------|
| 1   | Skin                  | V600E             | Mutation                                    |
|     | Bone                  | V600E             |                                             |
| 2   | Skin                  | V600E             | Mutation                                    |
|     | Skin                  | V600E             |                                             |
| 3   | Bone                  | V600E             | Mutation                                    |
| 7   | Heart                 | V600E             | Mutation                                    |
| 8   | Tumor                 | V600E             | Mutation                                    |
|     | PB (control)          | Wild              |                                             |
| 11  | Bone                  | V600E             | Mutation                                    |
|     | PB (control)          | Wild              |                                             |
| 16  | Skin                  | Wild              | Mutation                                    |
|     | Bone                  | V600E             |                                             |
|     | PB (control)          | Wild              |                                             |
| 21  | Bone                  | Wild              | Wild                                        |
|     | PB (control)          | Wild              |                                             |
| 24  | Skin                  | V600E             | Mutation                                    |
| 29  | Lung                  | Wild              | Wild                                        |
|     | PB (control)          | wild              |                                             |
| 35  | Brain                 | Wild              | Wild                                        |
|     | Bone marrow (control) | Wild              |                                             |
| 36  | Skin                  | V600E             | Mutation                                    |
|     | PB (control)          | Wild              |                                             |
| 39  | Bone                  | V600E             | Mutation                                    |
| 44  | Bone                  | V600E             | Mutation                                    |
|     | PB (control)          | Wild              |                                             |

UPN indicates unique patient number and PB, peripheral blood.

Wild means *BRAF*V600E mutation is absent.

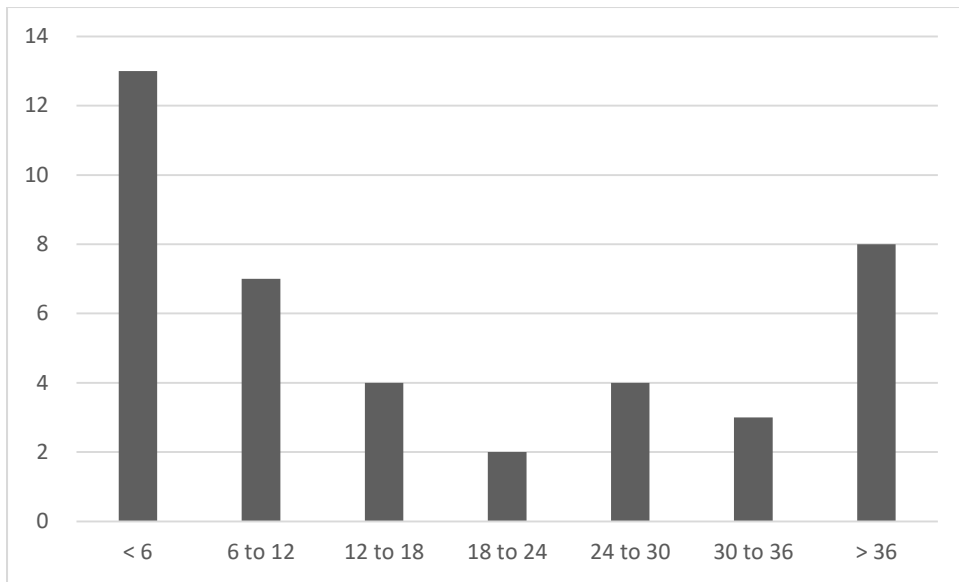

**Supplementary Figure S1. Duration between first sign of Erdheim-Chester disease and diagnosis.** Patient number is shown according to the duration (months).

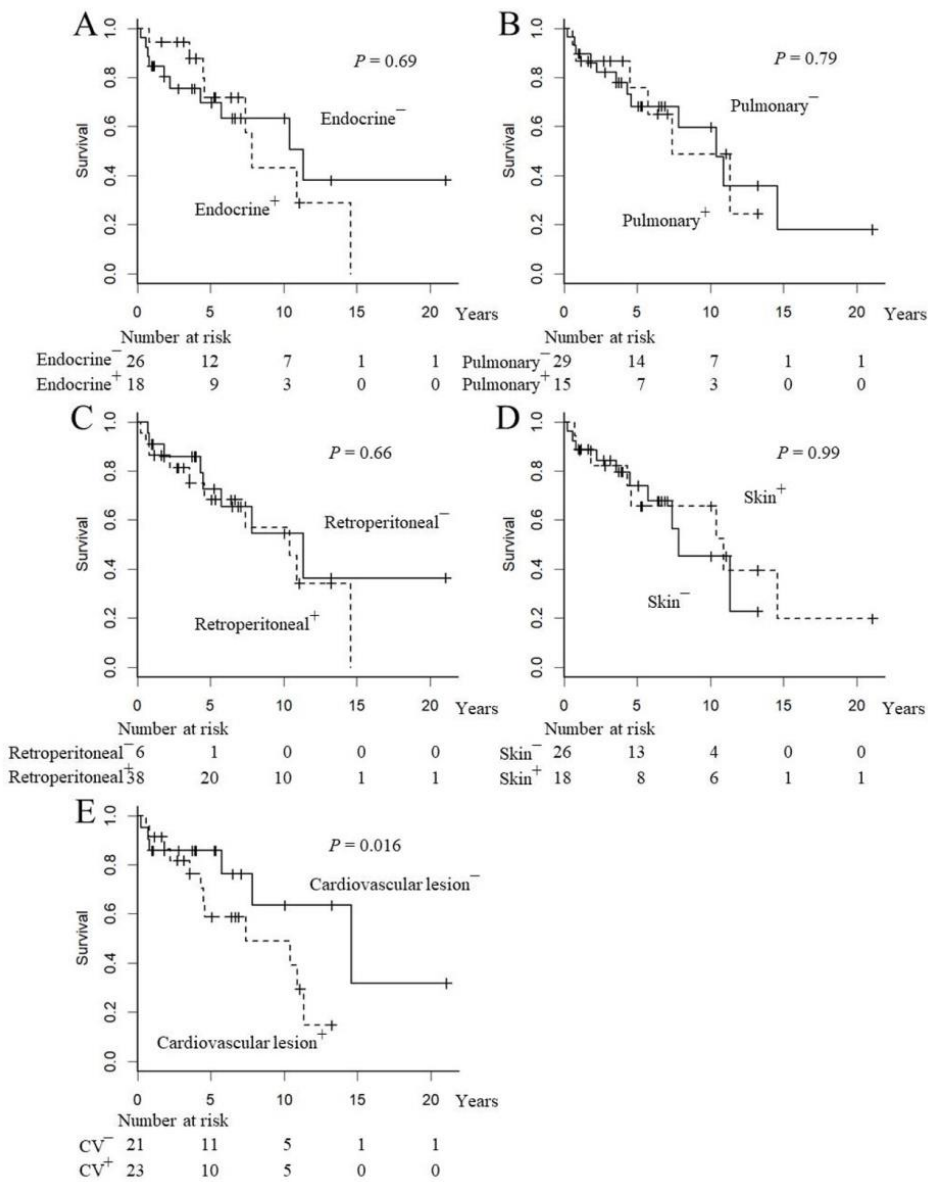

**Supplementary Figure S2. Survival curve of patients with Erdheim–Chester disease.** Kaplan–Meier estimation for survival from onset based on presence of (A) endocrine involvement, (B) pulmonary involvement, (C) retroperitoneal involvement, (D) cutaneous lesion, and (E) cardiovascular involvement. CV indicates Cardiovascular lesion.



## Supplemental References

1. Furuta T, Kiryu S, Yamada H et al. Erdheim-Chester disease with an 18F-fluorodeoxyglucose-avid breast mass and BRAF V600E mutation. *Jpn J Radiol.* 2014; 32: 282-287.
2. Suzuki HI, Hosoya N, Miyagawa K et al. Erdheim-Chester disease: multisystem involvement and management with interferon-alpha. *Leuk Res.* 2010; 34:e21-24.
3. Tsukamoto M, Akahane M, Nangaku M. Image of Erdheim-Chester disease requiring hemodialysis. *Clin Exp Nephrol.* 2012; 16: 811-812.
4. Naruse H, Shoda H, Okamoto A et al. A case of osteoarthropathy due to Erdheim-Chester disease with overlapping Langerhans' cell infiltration. *Intern Med.* 2010; 49: 1225-1228
5. Manaka K, Makita N, Iiri T. Erdheim-Chester disease and pituitary involvement: a unique case and the literature. *Endocr J.* 2014; 61: 185-194.
6. Matsui K, Nagata Y, Hiraoka M. Radiotherapy for Erdheim-Chester disease. *Int J Clin Oncol.* 2007; 12: 238-241.
7. Takeuchi T, Sato M, Sonomura T et al. Erdheim-Chester disease associated with intramedullary spinal cord lesion. *Br J Radiol.* 2012; 85: e62-64.
8. Ono K, Oshiro M, Uemura K et al. Erdheim-Chester disease: a case report with immunohistochemical and biochemical examination. *Hum Pathol.* 1996; 27: 91-95.
9. Shimada S, Ono K, Hashizume Y et al. Intracranial lesion of Erdheim-Chester disease. *Hum Pathol.* 2007; 38: 950-951.
10. Yamaguchi M, Shiota T, Kobashi Y. Erdheim-Chester disease presenting with pneumothorax. *Respiration.* 2011; 82: 552-556
11. Taguchi T, Iwasaki Y, Asaba K et al. Erdheim-Chester disease: report of a case with PCR-based analysis of the expression of osteopontin and survivin in Xanthogranulomas following glucocorticoid treatment. *Endocr J.* 2008; 55: 217-223
12. Taguchi T, Sano S, Iwasaki Y, Terada Y. Symmetric giant xanthogranulomas in Erdheim-Chester disease. *Eur J Nucl Med Mol Imaging.* 2009; 36: 1198
13. Ota M, Sakamoto M, Sato K et al. Immunopathological analysis of Erdheim-Chester disease with massive ascites. *Intern Med.* 2012;51: 2825-2830
14. Kawashiri MA, Ishibashi-Ueda H, Funada A et al. Erdheim-Chester disease involving the brain and the heart. *J Am Coll Cardiol.* 2014; 63: 1121
