# Supplementary material for: Prognostic factors of Erdheim–Chester disease: a nationwide survey in Japan
Source: PubMed Central journal article supplement — Haematologica. 2018 Jul 5;103(11):1815–24. doi: 10.3324/haematol.2018.190728 (PMC6278973; doi:10.3324/haematol.2018.190728), 2018-11
Supplement: 2018_190728-Disclosures_and_Contributions.pdf [file 2018_190728-Disclosures_and_Contributions.pdf]

Haematologica  
HAEMATOL/2018/190728  
Version 3

Prognostic factors of Erdheim-Chester Disease: A nationwide survey in  
Japan

Takashi Toya, Mizuki Ogura, Kazuhiro Toyama, Akihide Yoshimi, Aya Shinozaki-Ushiku, Akira Honda, Kenjiro Honda, Noriko Hosoya, Yukako Murakami, Hiroyuki Kawashima, Yasuhito Nannya, Shunya Arai, Fumihiko Nakamura, Yusuke Shinoda, Masaomi Nangaku, Kiyoshi Miyagawa, Masashi Fukayama, Akiko Moriya-Saito, Ichiro Katayama, Takashi Ogura, and Mineo Kurokawa

Disclosures: This study is supported by Grants-in-Aid of the Ministry of Health, Labor and Welfare of Japan (H28-Nanchi-Ippan-002 to A.Moriya-Saito, I.Katayama, T.Ogura, M.Kurokawa).

Contributions: T.T., M.O., K.T., A.Y., A.H., K.H., N.H., Y.M., H.K., Y.N., S.A., F.N., Y.S., M.N., K.M., A.MS., I.K., T.O., and M.K. collected the clinical data and specimens. T.T., M.O., K.T., A.Y., A.H., S.A., and M.K. were involved in the sequencing analyses. A.SU. and M.F. assessed the pathological findings. T.T., M.O., and A.MS. conducted the statistical analyses. T.T., M.O., K.T., and S.A. generated the figures and tables. A.Y. and M.K. designed the study and M.K. led the entire project. T.T., M.O., K.T., and M.K. wrote the manuscript. All authors participated in the discussion and interpretation of the data.
